# Supplementary figures and images for: Biological detoxification of Aflatoxin M₁ by lactic acid bacteria: experimental evidence from in vitro systems to fermented dairy products
Source: Research Square preprint supplement (doi:10.21203/rs.3.rs-8280315/v1), 2025-12-23

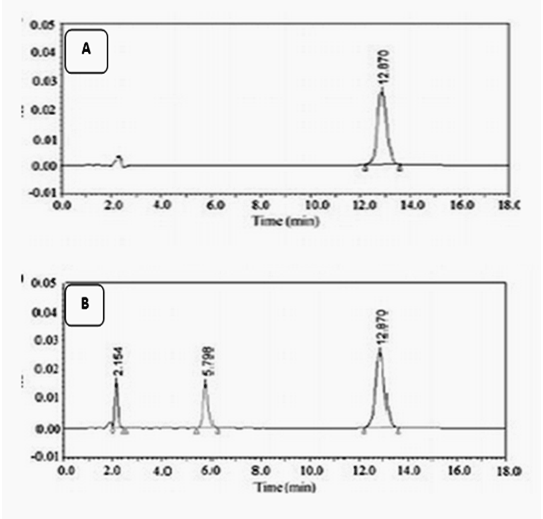


**S1:** HPLC chromatograms of **A**, AFM1 standard (3.6 ng mL-1); **B**, sample of Karish cheese

Supplement: Supplementary file 1 [file a8cf005657c97090c96d756a.docx]
